# Supplementary material for: Surface Adsorption of the Cancer Biomarker Lysophosphatidic Acid in Serum Studied by Acoustic Wave Biosensor
Source: MDPI journal article supplement (doi:10.3390/ma14154158), 2021-07-27
Supplement: s1 [file s1]

Supporting information

# Surface Adsorption of the Cancer Biomarker Lysophosphatidic Acid in Serum Studied by Acoustic Wave Biosensor

Brian De La Franier and Michael Thompson\*

Department of Chemistry, University of Toronto, 80 St. George Street, Toronto, ON M5S 3H6, Canada; brian.delafranier@mail.utoronto.ca

\* Correspondence: m.thompson@utoronto.ca; Tel.: +1-416-978-3575

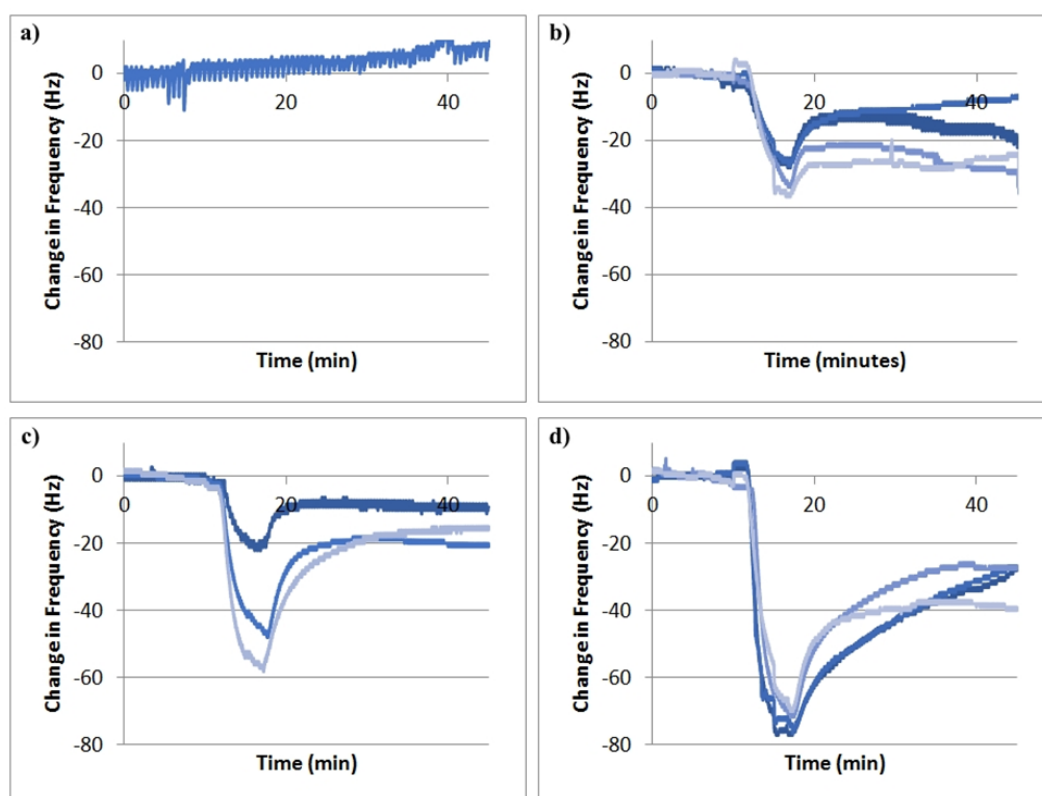

**Figure S1.** Frequency data for individual TSM runs of 100% PBS buffer containing (a) 0  $\mu\text{M}$  LPA, (b) 25  $\mu\text{M}$  LPA, (c) 50  $\mu\text{M}$  LPA, and (d) 100  $\mu\text{M}$  LPA.

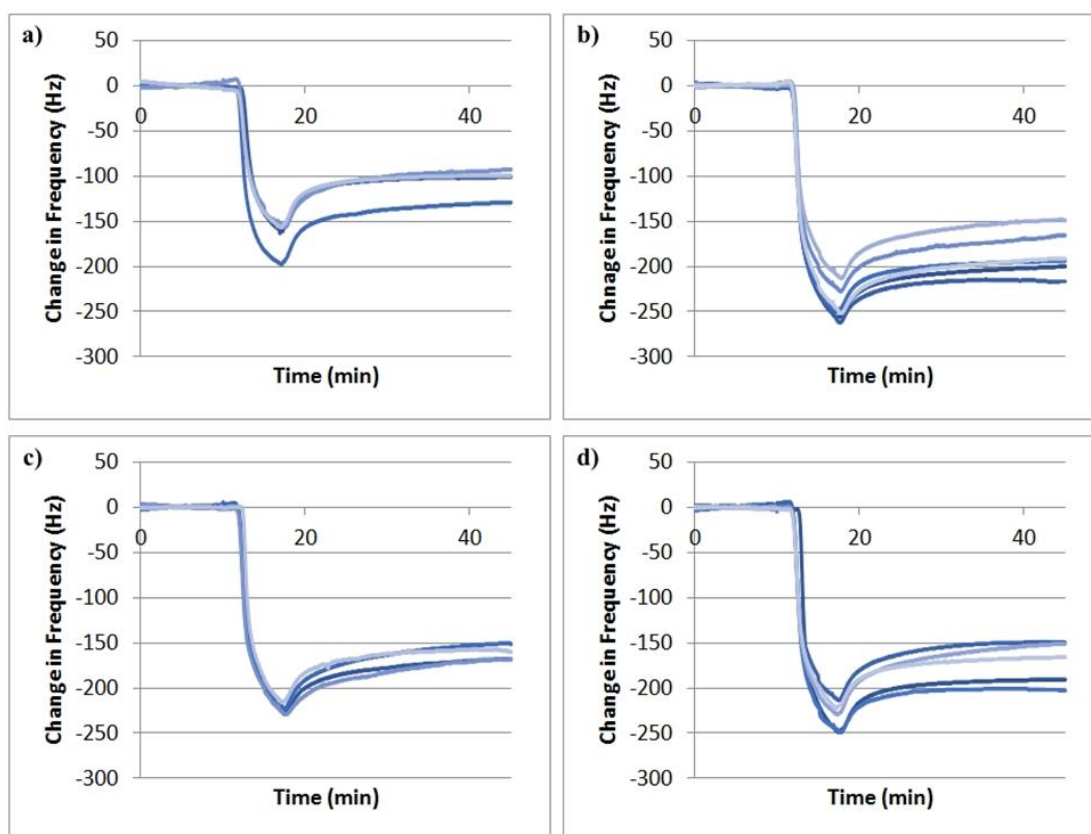

**Figure S2.** Frequency data for individual TSM runs of PBS buffer with 10% serum containing (a) 0  $\mu\text{M}$  LPA, (b) 25  $\mu\text{M}$  LPA, (c) 50  $\mu\text{M}$  LPA, and (d) 100  $\mu\text{M}$  LPA.

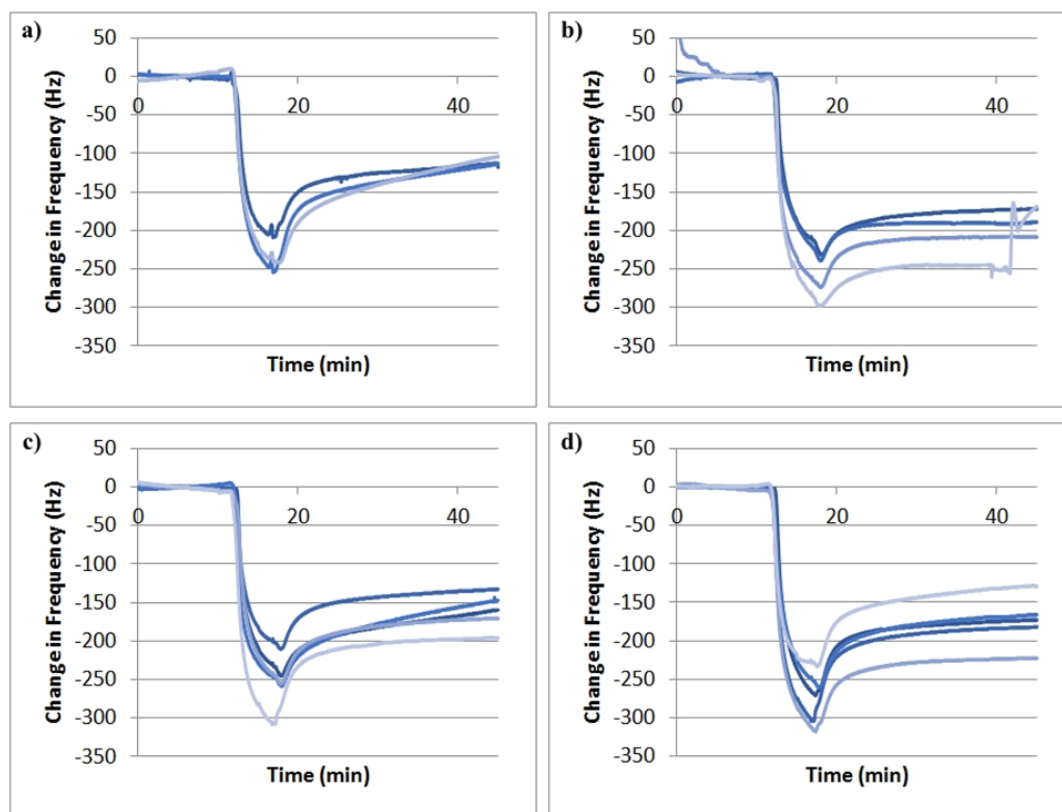

**Figure S3.** Frequency data for individual TSM runs of PBS buffer with 20% serum containing (a) 0  $\mu\text{M}$  LPA, (b) 25  $\mu\text{M}$  LPA, (c) 50  $\mu\text{M}$  LPA, and (d) 100  $\mu\text{M}$  LPA.

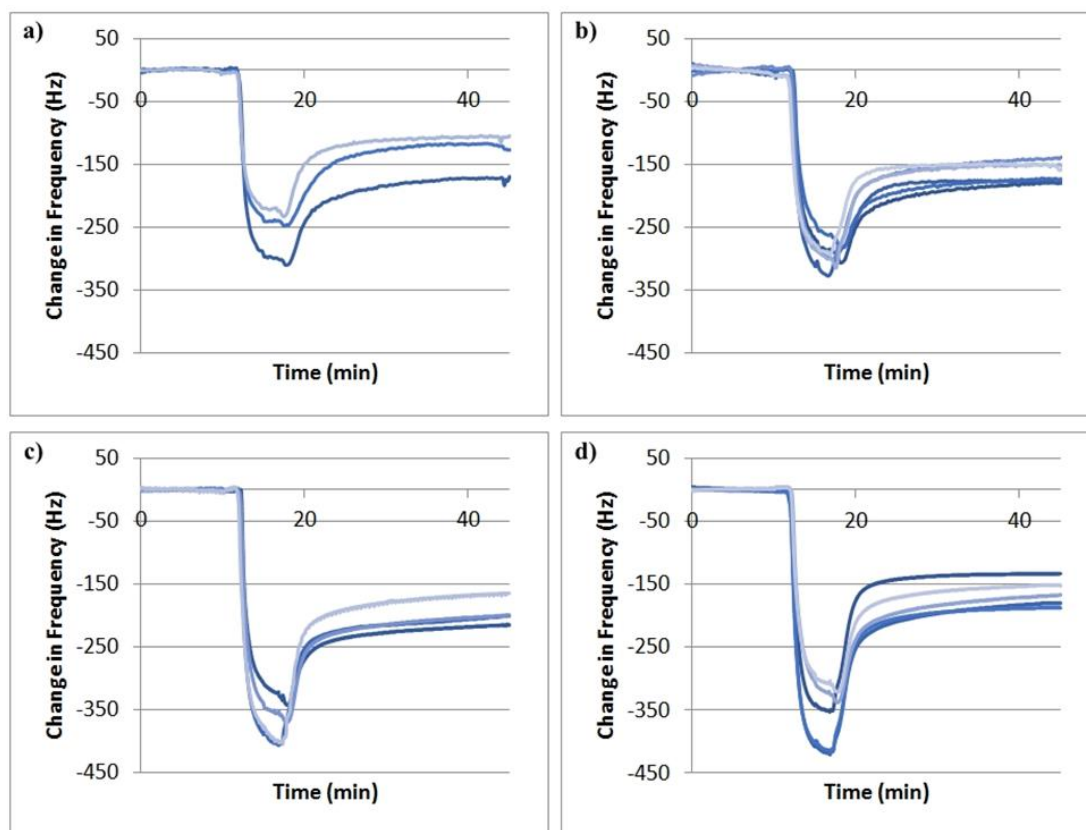

**Figure S4.** Frequency data for individual TSM runs of PBS buffer with 50% serum containing (a) 0  $\mu\text{M}$  LPA, (b) 25  $\mu\text{M}$  LPA, (c) 50  $\mu\text{M}$  LPA, and (d) 100  $\mu\text{M}$  LPA.

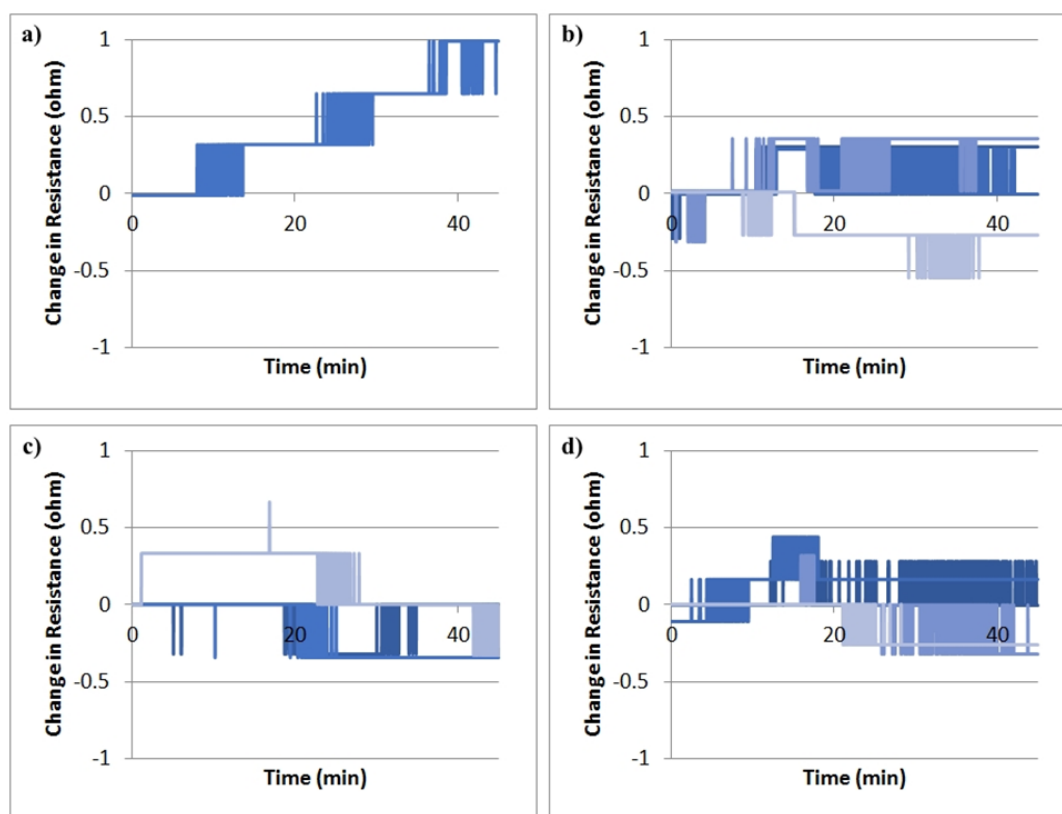

**Figure S5.** Resistance data for individual TSM runs of 100% PBS buffer containing (a) 0  $\mu\text{M}$  LPA, (b) 25  $\mu\text{M}$  LPA, (c) 50  $\mu\text{M}$  LPA, and (d) 100  $\mu\text{M}$  LPA.

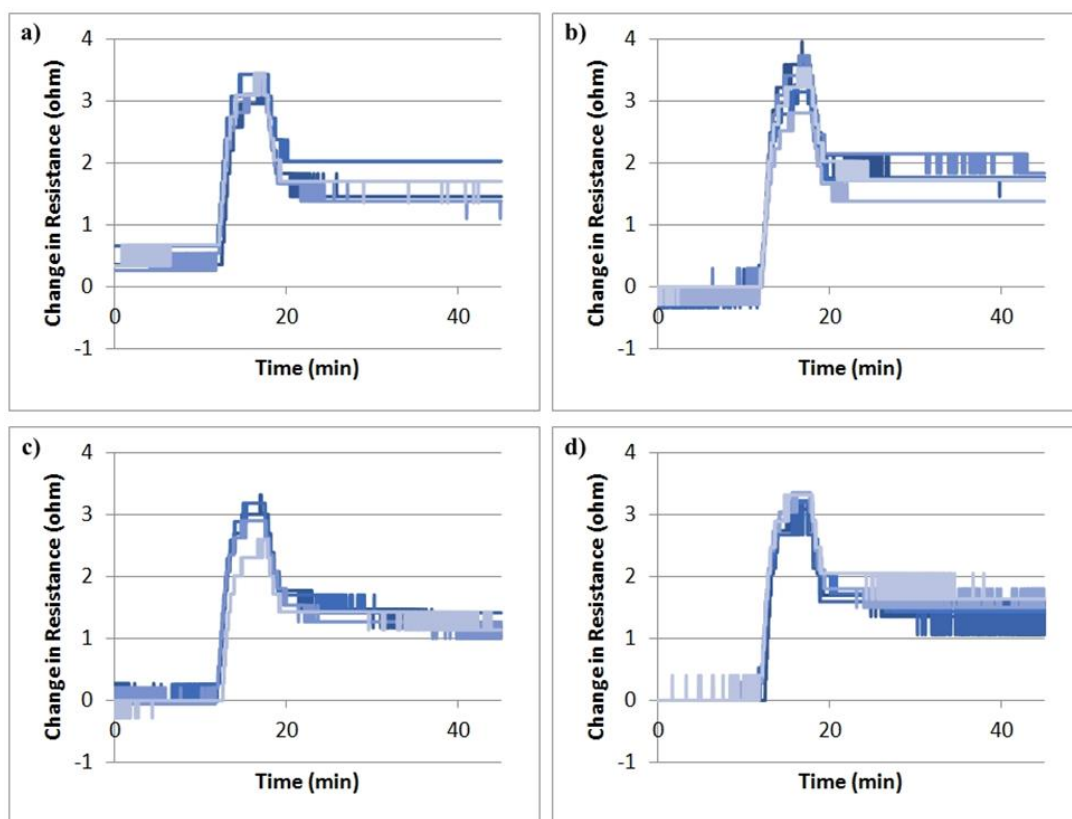

**Figure S6.** Resistance data for individual TSM runs of PBS buffer with 10% serum containing (a) 0  $\mu\text{M}$  LPA, (b) 25  $\mu\text{M}$  LPA, (c) 50  $\mu\text{M}$  LPA, and (d) 100  $\mu\text{M}$  LPA.

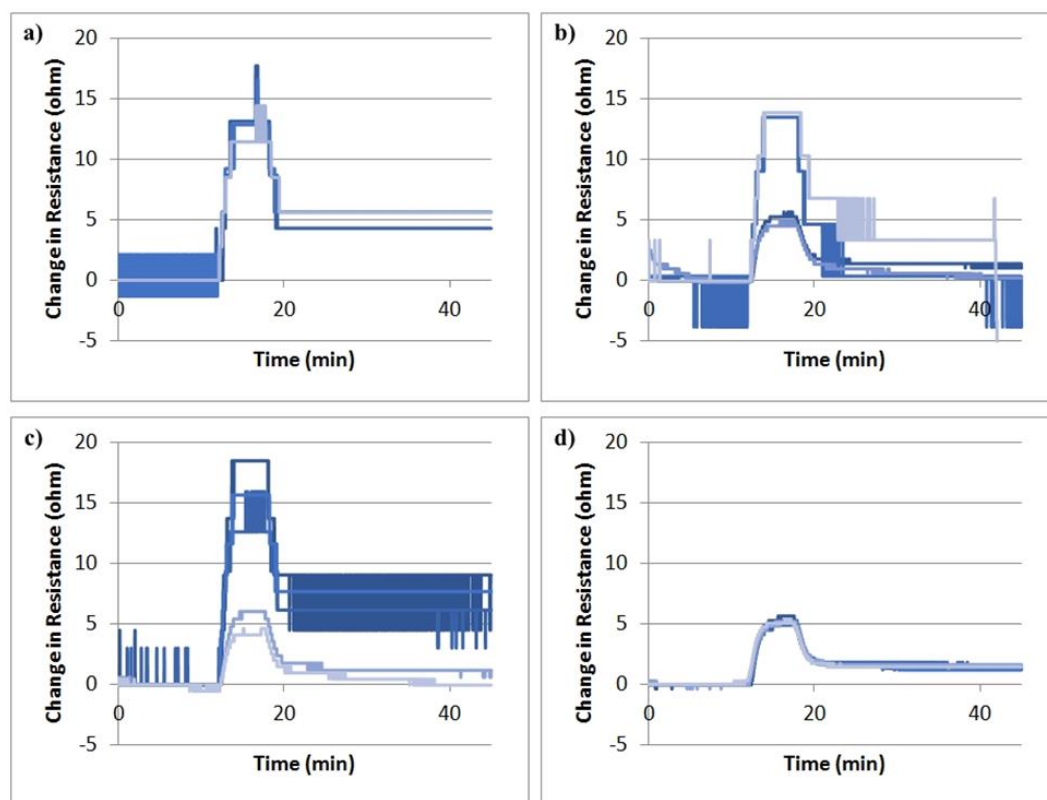

**Figure S7.** Resistance data for individual TSM runs of PBS buffer with 20% serum containing (a) 0  $\mu\text{M}$  LPA, (b) 25  $\mu\text{M}$  LPA, (c) 50  $\mu\text{M}$  LPA, and (d) 100  $\mu\text{M}$  LPA.

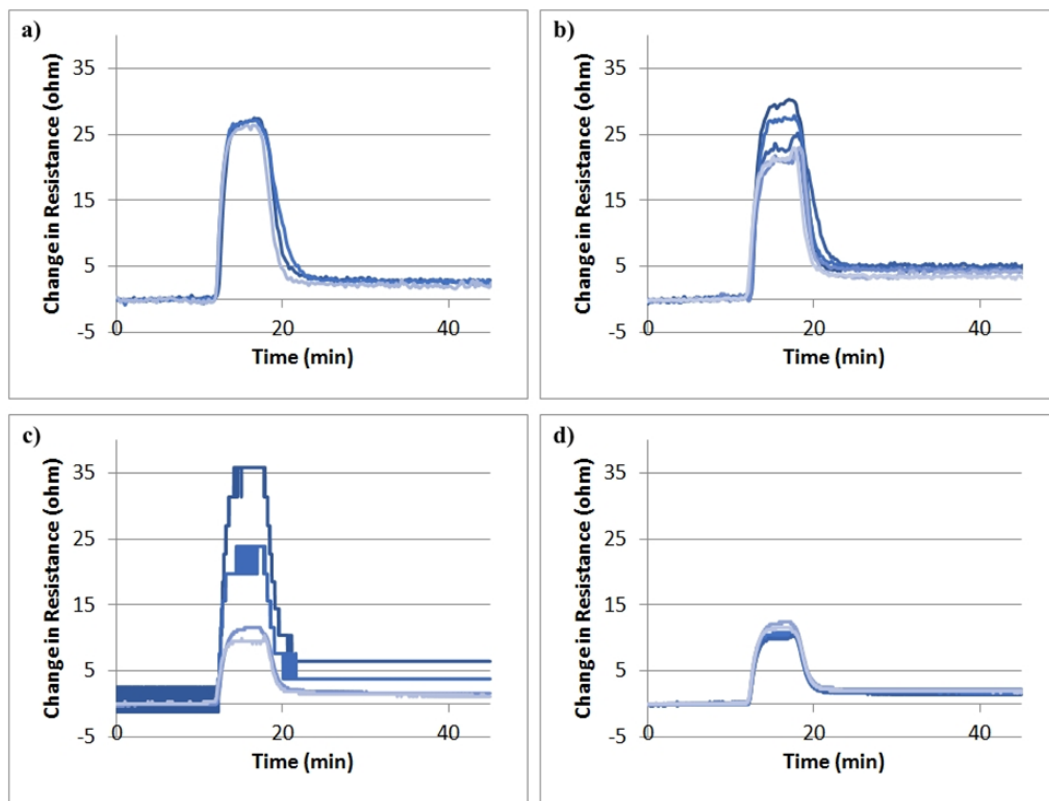

**Figure S8.** Resistance data for individual TSM runs of PBS buffer with 50% serum containing (a) 0  $\mu$ M LPA, (b) 25  $\mu$ M LPA, (c) 50  $\mu$ M LPA, and (d) 100  $\mu$ M LPA.
